# Hypoxia as a predictor of mortality among patients admitted with COVID-19 disease in three referral hospitals in Kenya, October 2020 to December 2021

**Authors:** Anthony Waruru<sup>1</sup>, Jonesmus Mutua Wambua<sup>2</sup>, Frank Victor Otieno<sup>3</sup>, James Mbai<sup>3</sup>, Mary Mwangome<sup>2</sup>, Peninah Munyua<sup>4</sup>, Wanjiru Waruiru<sup>2</sup>, Sasi Jonnalagadda<sup>1</sup>, Carol Ngunu<sup>5</sup>, Annastacia K. Muange<sup>6</sup>, James Otieno<sup>6</sup>, Dickens Onyango<sup>7</sup>, Nelly Muturi<sup>8</sup>, Anne Njoroge<sup>9</sup>

**Affiliations:** 1) Division of Global HIV & TB, US Centers for Disease Control and Prevention (CDC), , Nairobi, Kenya; 2) Global Programs for Research and Training, University of California San Francisco, Nairobi, Kenya; 3) Mbagathi County Referral Hospital, Nairobi, Kenya; 4) Division of Global Health Protection, US Centers for Disease Control and Prevention (CDC), Nairobi Kenya; 5) Nairobi County Department of Health, Nairobi, Kenya; 6) Division of Disease Surveillance and Response (DDSR), Kenya; 7) Kisumu County Department of Health, Kisumu, Kenya; 8) AIRBEL Impact Lab, International Rescue Committee (IRC), Nairobi, Kenya; 9) International Training & Education Center for Health (I-TECH), University of Washington, Nairobi, Kenya

**Correspondence:** Anthony Waruru, [awaruru@cdc.gov](mailto:awaruru@cdc.gov)

**Funding:** This publication was made possible by support from the American Rescue Plan Act of 2021 and the U.S. President's Emergency Plan for AIDS Relief (PEPFAR) through cooperative agreements [GH002338, GH002266, & GH002339] from the U.S. Centers for Disease Control and Prevention (CDC), Division of Global HIV & TB (DGHT).

## Abstract

**Introduction:** Using peripheral oxygen saturation (SpO<sub>2</sub>) measurement is a cost-effective and reliable approach to assess the need for oxygen supplementation in patients admitted with coronavirus disease 2019 (COVID-19). Patients who have a SpO<sub>2</sub> level of <95% are considered hypoxic and, per COVID-19 management guidelines, should receive oxygen supplementation. We sought to determine whether hypoxia at admission predicted adverse COVID-19 outcomes including mortality among patients admitted with COVID-19 disease in Kenya.

**Methods:** The study was a cross-sectional retrospective medical chart review of patients hospitalized with COVID-19 between October 1, 2020, and December 31, 2021 in three purposively selected health facilities in Kilifi, Nairobi and Kisumu. We explored the differences in proportions of categorical

35 variables using the  $\chi^2$  test and assessed predictors (selected *a priori*) of mortality among patients with  
36 hypoxia using Cox proportional hazards models. Using the Kaplan-Meier method, we also computed  
37 survival probabilities by hypoxia status for patients on room air or oxygen supplementation and  
38 produced survival graphs.

39 **Results:** Of the 1,124 COVID-19 patients, 94.8% had documented SpO<sub>2</sub> measurements at admission,  
40 and 81.4% were found to have hypoxia, with 39.9% of hypoxic patients not exhibiting dyspnea.  
41 Hypoxic patients compared to those with normal oxygen saturation levels were significantly older (60+  
42 years: 44.6 vs. 24.4%) and had a higher prevalence of dyspnea (60.1 vs. 36.9%), higher pulse rate (38.2  
43 vs. 24.6%), and hypertension (40.4 vs. 25.8%),  $p < 0.001$ . Oxygen supplementation was provided to only  
44 68.6% of hypoxic patients. Mortality was notably higher in hypoxic patients versus those with normal  
45 SpO<sub>2</sub> (38.0% vs. 13.6%,  $p < 0.001$ ), with hypoxia being a key predictor of death. Hypoxic, older patients  
46 ( $\geq 60$  years), and those with dyspnea had a higher risk of death (adjusted hazard ratio: 1.9 [95%  
47 confidence interval (CI): 1.2–2.8], 1.8 [95% CI 1.3–2.6] and 1.5 [95% CI 1.2–2.0], respectively).  
48 Regardless of dyspnea or oxygen supplementation, survival probabilities were worse for hypoxic  
49 patients ( $p < 0.001$ ).

50 **Conclusions:** Hypoxia was prevalent among hospitalized COVID-19 patients, even without respiratory  
51 distress symptoms. These findings underscore the importance early identification and management of  
52 hypoxia in COVID-19 patients, thereby guiding clinical care and improving outcomes, particularly for  
53 older or sicker patients.

54 **Keywords:** Hypoxia; COVID-19; dyspnea; COVID-19-associated mortality; survival probabilities;  
55 Kenya

56

## 57 **Author summary**

58 Hypoxia (low oxygen levels) is a common complication in severe COVID-19 and can be a key predictor  
59 of poor outcomes, including death. In low-resource settings like Kenya, the availability of advanced  
60 diagnostic tools is limited, and simple methods like peripheral oxygen saturation (SpO<sub>2</sub>) measurements  
61 are crucial for early identification and management of hypoxia. Despite the importance of oxygen  
62 supplementation for hypoxic patients, data on how hypoxia at admission correlates with COVID-19  
63 outcomes in sub-Saharan Africa is limited. We conducted a cross-sectional retrospective study of 1,124  
64 COVID-19 patients hospitalized between October 2020 and December 2021 in three Kenyan counties.  
65 We found that 81.4% of patients had hypoxia at admission, but 39.9% of these patients did not exhibit  
66 signs of respiratory distress (dyspnea). Hypoxia at admission was associated with higher mortality,  
67 especially among older patients ( $\geq 60$  years) and those with comorbidities, such as hypertension.  
68 Survival probabilities for hypoxic patients were significantly lower, regardless of whether they showed  
69 signs of dyspnea or received oxygen supplementation. Hypoxia is highly prevalent among hospitalized  
70 COVID-19 patients, even in the absence of respiratory distress, highlighting the need for routine oxygen  
71 level screening using simple, cost-effective tools like oxymeters. Early detection and management of  
72 hypoxia, especially in older or high-risk patients, is essential to improving clinical outcomes in COVID-  
73 19. These findings provide evidence for refining COVID-19 management protocols in resource-limited  
74 settings, with an emphasis on early intervention to reduce mortality.

## 76 **Introduction**

77 Severe acute respiratory syndrome coronavirus type 2 (SARS-CoV-2) virus primarily targets the  
78 respiratory system, often leading to pneumonia and acute respiratory distress syndrome (ARDS).  
79 Hypoxia in SARS-CoV-2 infection reflects impaired gas exchange in the lungs and results in decreased  
80 oxygen levels in the bloodstream.. Studies underscore a strong correlation between hypoxia and the  
81 severity of coronavirus disease (COVID-19), with severely affected patients often exhibiting profound  
82 hypoxia [1,2]. This hypoxia has been associated with the activation of inflammatory pathways,  
83 potentially contributing to the cytokine storm observed in severe COVID-19 cases [3].

84 Early in the COVID-19 pandemic, it became evident that patients with hypoxia were at higher risk of  
85 adverse outcomes [4–7], highlighting the critical role of oxygen therapy in managing severe COVID-19  
86 cases. The saturation of peripheral oxygen (SpO<sub>2</sub>), measured via pulse oximetry, provides crucial  
87 information for patient management, aiding in decisions such as hospitalization, especially for elderly  
88 patients [8]. SpO<sub>2</sub> measurements help to categorize patients as having hypoxemia, defined using a cutoff  
89 point, with normal oxygen saturation levels in the blood ranging from 95% to 100% and low peripheral  
90 oxygen saturation being lower than 95% [9]. In Kenya, hypoxia during COVID-19 was defined as SpO<sub>2</sub>  
91  $\leq 94\%$  on room air [10].

92 Since pulse oximetry is quick, noninvasive, and painless, the World Health Organization (WHO)  
93 recommended its use in monitoring patients with COVID-19 [11], and provided guidance for the clinical  
94 management of COVID-19 patients [12]. Despite its simplicity and non-invasiveness, pulse oximetry  
95 was underutilized in resource-limited settings during the pandemic, where oxygen availability was  
96 scarce [13,14]. A notable observation during the pandemic was “silent hypoxia,” where patients  
97 exhibited low SpO<sub>2</sub> levels without dyspnea, potentially leading to delayed recognition of hypoxemia if  
98 SpO<sub>2</sub> measurements were not routinely performed [6,15,16]. This condition underscores the importance

99 of SpO<sub>2</sub> monitoring in assessing COVID-19 severity, as abnormal chest X-ray findings do not always  
100 correlate with SpO<sub>2</sub> levels [17].

101 Silent hypoxia poses a significant challenge in managing COVID-19 patients, as it may indicate early  
102 deterioration, and mortality, even in the absence of respiratory symptoms [18–20]. Patients with pre-  
103 existing respiratory or cardiovascular conditions, such as chronic obstructive pulmonary disease, or heart  
104 disease, are particularly susceptible to hypoxia and face increased risks during COVID-19 infection  
105 [21]. Additionally, non-respiratory non-communicable diseases like obesity have been linked to worse  
106 COVID-19 outcomes [22,23].

107 This paper describes the availability of pulse oximetry and the prevalence of hypoxia among COVID-19  
108 patients hospitalized in Kenya during the pandemic. We characterize the impact of hypoxia on COVID-  
109 19 outcomes, including mortality rates among hospitalized patients.

110

111

112

## 113 **Methods**

### 114 *Study setting*

115 The first COVID-19 case in Kenya was reported on 13<sup>th</sup> March 2020. During the period covered by this  
116 study Kenya underwent four distinct waves of SARS-CoV-2 infections, driven by different variants *B.1*  
117 (2<sup>nd</sup> wave: October 2020 to January 2021), *Alpha/Beta* (3<sup>rd</sup> wave: February to May 2021), *Delta* (4<sup>th</sup>  
118 wave: June to November 2021), and *Omicron* (5<sup>th</sup> wave: December 2021) variants [24]. As of December  
119 31, 2021, Kenya had recorded 297,155 confirmed COVID-19 cases and 5,381 deaths, resulting in a  
120 case-fatality rate of 1.8% [25].

### 121 *Study sites*

122 The study was conducted in three purposively selected referral facilities in three counties: Mbagathi  
123 County Referral Hospital (Nairobi County), Jaramogi Oginga Odinga Teaching and Referral Hospital  
124 (Kisumu County), and Kilifi County Referral Hospital (Kilifi County) . The purposive selection of the  
125 three facilities was conducted in collaboration with the Division of Integrated Disease Surveillance and  
126 Response (DDSR), Ministry of Health, and was based on the high number of COVID-19 cases reported  
127 during the selected study period and the prevalence of HIV in the three counties. Nairobi County has a  
128 reported HIV prevalence of 3.8%, Kisumu County 17.5%, and Kilifi County 2.3% [26]. As of the end of  
129 2021, the cumulative COVID-19 caseload was 119,538 in Nairobi, 7,368 in Kisumu, and 6,461 in Kilifi  
130 County [27].

### 131 *Data collection and abstraction procedures*

132 The study involved a retrospective cohort analysis of inpatient medical records from hospitalized  
133 COVID-19 patients in Kenya spanning October 1, 2020 to December 31, 2021. A team of trained  
134 research assistants comprising clinical and health records officers enumerated all the inpatients with a  
135 diagnosis of COVID admitted to the three facilities in that time period. Medical charts for these patients

136 were retrieved from the health records departments for abstraction. Data were abstracted using a  
137 formatted data abstraction tool programmed in Open Data Kit (ODK), <<https://opendatakit.org>>, and  
138 submitted to a central server for processing and analyses. All the data were stripped of all personally  
139 identifying information.

#### 140 *Measures*

141 A case **infected with SARS-CoV-2** was defined as a patient with a positive rapid diagnostic test or PCR  
142 test result or who was presumptively managed for COVID-19 based on symptomatic presentation.  
143 Clinical signs and symptoms were also abstracted, including fever, cough, and chest tightness,. Chest X-  
144 ray findings (normal/abnormal), if available, were also abstracted. Co-morbidities such as diabetes and  
145 hypertension were abstracted as present if the patient had reported them, even if blood glucose levels or  
146 current blood pressure readings were normal. We defined **saturation of peripheral oxygen (SpO<sub>2</sub>)** as a  
147 measure of how much hemoglobin is bound to oxygen compared to how much hemoglobin remains  
148 unbound. **Hypoxia** was defined as SpO<sub>2</sub> less than or equal to 94% on room air at admission [10]. **Fever**  
149 was defined as elevated body temperature >37.2°C, and **high respiratory rate (RR)** as ≥30  
150 breaths/minute. The outcome variable categories were in-hospital death, discharge, or referral to another  
151 facility. Provision of **supplemental oxygen** was captured after admission, and **dyspnea** was  
152 symptomatically assessed and documented as a presentation of the patients with respiratory distress or  
153 shortness of breath.

#### 154 *Analyses*

155 We tested for the differences in distribution using the Pearson Chi-square ( $\chi^2$ ) test. We assessed  
156 predictors for mortality for patients with hypoxia using Cox proportional hazards regression after  
157 calculating the time from admission to death in days and censoring the outcome. We included all  
158 potential predictors in the crude analyses after testing for the assumption of proportionality using the

159 Schoenfeld test, but only variables with at least 90% completeness and a significance level of  $p < 0.1$   
160 were included in the multivariable model. In the multivariable model, we controlled for oxygen  
161 saturation, age (in years), hypertension, diabetes, cardiovascular disease, and dyspnea. We additionally  
162 calculated survival probabilities by hypoxia status at admission for patients on room air and oxygen  
163 supplementation using the Kaplan–Meier method, and produced survival graphs by hypoxia status.

#### 164 *Ethical approvals*

165 This activity was reviewed by CDC, deemed not research, and was conducted consistent with applicable  
166 federal law and CDC policy.\* It was also reviewed by the University of California San Francisco’s  
167 Institutional Review Board (UCSF-22-37353) and AMREF’s Ethical and Scientific Review Committee  
168 (AMREF-ESRC P1233/2022), the University of California, San Francisco Human Research Protection  
169 Program Institutional Review Board (IRB approval number 22-37353), and ethical review committees  
170 from the three participating hospitals. The Kenya National Commission for Science, Technology, and  
171 Innovation (NACOSTI) permitted this study (License No: NACOSTI/P/22/19903). Due to the study’s  
172 retrospective nature and the use of de-identified data, the requirement for individual patient consent was  
173 waived.

174

175 \*45 C.F.R. part 46.102(l)(2), 21 C.F.R. part 56; 42 U.S.C. Sect. 241(d); 5 U.S.C. Sect. 552a; 44 U.S.C.  
176 Sect. 3501 et seq.

## 177 **Results**

### 178 *Patient characteristics, clinical presentation, and SpO<sub>2</sub>*

179 Among 1,124 patients hospitalized with COVID-19, 1,066 (94.8%) had documented SpO<sub>2</sub>  
180 measurements at admission, of whom 868 (81.4%) had hypoxia. Hypoxic patients compared to those  
181 with normal oxygen saturation levels were significantly older (60+ years: 44.6 vs. 24.4%) and had a



182 higher prevalence of dyspnea (60.1 vs. 36.9%), higher pulse rate (38.2 vs. 24.6%), and hypertension  
 183 (40.4 vs. 25.8%) (p<0.001). Among patients with hypoxemia, about 2 in every 5, 346 (39.9%) did not  
 184 have dyspnea p<0.001. A higher proportion of patients with hypoxemia died compared to those with  
 185 normal SpO<sub>2</sub> (38.0% vs 13.6%) p<0.001 (Table 1).

186 **Table 1: Patients' demographic and clinical characteristics by hypoxia and mortality, Kenya 2020-21**

| Characteristics*                     | Total       | Hypoxia <sup>†</sup> , n(%)   | Normal SpO <sub>2</sub> n(%)  | p-value <sup>§</sup> |
|--------------------------------------|-------------|-------------------------------|-------------------------------|----------------------|
| <b>Total</b>                         | <b>1066</b> | <b>868 (81.4)<sup>‡</sup></b> | <b>198 (18.6)<sup>‡</sup></b> |                      |
| <b>Sex (n=1062)</b>                  |             |                               |                               | 0.065                |
| Male                                 | 567 (53.4)  | 474 (54.7)                    | 93 (47.4)                     |                      |
| Female                               | 495 (46.6)  | 392 (45.3)                    | 103 (52.6)                    |                      |
| <b>Age in years (n=1063)</b>         |             |                               |                               | <0.001               |
| <40                                  | 245 (23.0)  | 152 (17.6)                    | 93 (47.2)                     |                      |
| 40 – 59                              | 384 (36.1)  | 328 (37.9)                    | 56 (28.4)                     |                      |
| ≥60                                  | 434 (40.8)  | 386 (44.6)                    | 48 (24.4)                     |                      |
| <b>Occupation (n=665)</b>            |             |                               |                               | 0.934                |
| Formal                               | 273 (41.1)  | 221 (41.1)                    | 52 (40.9)                     |                      |
| Informal                             | 379 (57.0)  | 307 (57.1)                    | 72 (56.7)                     |                      |
| Other                                | 13 (2.0)    | 10 (1.9)                      | 3 (2.4)                       |                      |
| <b>County (n=1066)</b>               |             |                               |                               | 0.297                |
| Kilifi                               | 146 (13.7)  | 119 (13.7)                    | 27 (13.6)                     |                      |
| Kisumu                               | 533 (50.0)  | 443 (51.0)                    | 90 (45.5)                     |                      |
| Nairobi                              | 387 (36.3)  | 306 (35.3)                    | 81 (40.9)                     |                      |
| <b>HIV status (n=99)</b>             |             |                               |                               | 0.936                |
| Positive                             | 88 (88.9)   | 65 (89.0)                     | 23 (88.5)                     |                      |
| Negative                             | 11 (11.1)   | 8 (11.0)                      | 3 (11.5)                      |                      |
| <b>Temperature (n=583)</b>           |             |                               |                               | 0.990                |
| Elevated body temperature (>37.2 °C) | 45 (7.7)    | 36 (7.7)                      | 9 (7.7)                       |                      |
| Normal (36.5-37.2 °C)                | 538 (92.3)  | 430 (92.3)                    | 108 (92.3)                    |                      |
| <b>Cough (n=1066)</b>                |             |                               |                               | <0.001               |
| Yes                                  | 269 (25.2)  | 190 (21.9)                    | 79 (39.9)                     |                      |
| No                                   | 797 (74.8)  | 678 (78.1)                    | 119 (60.1)                    |                      |
| <b>Chest tightness (n=1066)</b>      |             |                               |                               | 0.177                |
| Yes                                  | 584 (54.8)  | 467 (53.8)                    | 117 (59.1)                    |                      |
| No                                   | 482 (45.2)  | 401 (46.2)                    | 81 (40.9)                     |                      |
| <b>Hypertension (n=1066)</b>         |             |                               |                               | <0.001               |
| Yes                                  | 402 (37.7)  | 351 (40.4)                    | 51 (25.8)                     |                      |
| No                                   | 664 (62.3)  | 517 (59.6)                    | 147 (74.2)                    |                      |
| <b>Diabetes (n=1066)</b>             |             |                               |                               | 0.110                |
| Yes                                  | 251 (23.5)  | 213 (24.5)                    | 38 (19.2)                     |                      |
| No                                   | 815 (76.5)  | 655 (75.5)                    | 160 (80.8)                    |                      |
| <b>Pulse rate (PR) (n=970)</b>       |             |                               |                               | <0.001               |
| Low PR (<60 bpm)                     | 35(3.6)     | 34 (4.3)                      | 1 (0.5)                       |                      |
| Normal PR (60-100 bpm)               | 590(60.8)   | 450 (57.5)                    | 140 (74.9)                    |                      |
| High PR (>100 bpm)                   | 345(35.6)   | 299 (38.2)                    | 46 (24.6)                     |                      |
| <b>Cardiovascular issues</b>         |             |                               |                               | 0.281                |
| With issues                          | 1045 (98.0) | 849 (97.8)                    | 196 (99.0)                    |                      |
| No issues                            | 21 (2.0)    | 19 (2.2)                      | 2 (1.0)                       |                      |

|                                        |            |            |            |        |
|----------------------------------------|------------|------------|------------|--------|
| <b>Dyspnea (n=1066)</b>                |            |            |            | <0.001 |
| Dyspnea                                | 595 (55.8) | 522 (60.1) | 73 (36.9)  |        |
| None                                   | 471 (44.2) | 346 (39.9) | 125 (63.1) |        |
| <b>Oxygen supplementation (n=1066)</b> |            |            |            | <0.001 |
| Yes                                    | 644(60.4)  | 595(68.6)  | 49(24.8)   |        |
| No                                     | 422(39.6)  | 273(31.5)  | 149(75.3)  |        |
| <b>Patient Outcome (n=1066)</b>        |            |            |            | <0.001 |
| Dead                                   | 357(33.5)  | 330 (38.0) | 27 (13.6)  |        |
| Discharged                             | 680(63.8)  | 516 (59.4) | 164 (82.8) |        |
| Referred out                           | 29(2.7)    | 22 (2.5)   | 7 (3.5)    |        |

187 \*Some variables had missing values. The number of included records is indicated against the variable  
188 names.

189 †Hypoxia was defined as SpO<sub>2</sub> reading of ≤94% on room air measured during admission.

190 ‡Row percentages

191 §Chi-square p-values, significance at p<0.05

192 *Dyspnea and hypertension in relation to patient outcomes by SpO<sub>2</sub> at admission*

193 Among all COVID-19 patients without dyspnea, hypoxic patients had three-fold more deaths than those  
194 with normal SpO<sub>2</sub> saturation (29.8% vs. 9.6%), p<0.001. Among all COVID-19 patients with dyspnea,  
195 hypoxic patients had two-fold more deaths than those with normal SpO<sub>2</sub> saturation (43.5% vs. 20.6%),  
196 p=0.002 (Figure 1).

197

198 **Figure 1:** Hypoxia and outcomes for COVID-19 patients with and without dyspnea, Kenya 2020-21

199 Among all COVID-19 patients, those with hypoxia had a higher proportion of deaths than those with  
200 normal SpO<sub>2</sub> saturation (38.0% vs. 13.6%), p<0.001. There were more deaths among COVID-19  
201 patients with hypertension and hypoxia compared to hypertensive patients with normal SpO<sub>2</sub> saturation  
202 (42.5% vs. 7.8%), p<0.001. For COVID-19 patients without hypertension, mortality was higher among  
203 patients who had hypoxia (35.0%) compared to patients with normal SpO<sub>2</sub> saturation (15.6%), p<0.001  
204 (Figure 2).

205

206

207 **Figure 2:** Hypoxia and mortality for all patients with and without hypertension, Kenya 2020-21

208 *Influence of SpO<sub>2</sub> at admission on survival probability*

209 Whether on oxygen supplementation or room air, survival probabilities were better for patients who did  
210 not have hypoxia on admission. Survival for non-hypoxic COVID-19 patients on room air plateaued  
211 from about two weeks of hospitalization, while survival for hypoxic patients continued to worsen at a  
212 more rapid pace (Figure 3a). Both hypoxic and non-hypoxic patients had similar declining survival rates  
213 beyond a month of hospitalization. Half of the hypoxic patients on room air survived up to the 20<sup>th</sup> day,  
214 and over half of the non-hypoxic patients on room air survived over the 50<sup>th</sup> day. For patients on  
215 supplemental oxygen (Figure 3b), survival probabilities rapidly worsened, and by around 10 days, over  
216 half of the hypoxic patients on admission were dead, compared to non-hypoxic patients on admission  
217 who survived a little longer.

218

219 **Figure 3:** Survival probabilities for COVID-19 patients on room air (a) and on oxygen supplementation  
220 (b), by oxygen saturation levels, Kenya 2020-21

221 *Predictors of mortality among patients with hypoxia*

222 Out of 1,123 patients admitted with COVID-19, 1122 recorded time-to-outcome data, and 868  
223 experienced hypoxia. The median duration of admission was 6 days, interquartile range (IQR) 2-10.  
224 Among the 1066 patients with hypoxia data, 357 (33.5%) died. Mortality was significantly higher in  
225 hypoxic patients (38.0%) compared to those with normal oxygen levels (13.6%) (p<0.001). Lower  
226 mortality rates were observed in non-hypoxic patients, females, those under 40, those with formal  
227 employment, HIV negative individuals, and those without hypertension, diabetes, cardiovascular issues,  
228 or dyspnea. Crude proportional hazards analysis identified hypoxia, age, hypertension, diabetes,  
229 cardiovascular issues, and dyspnea as significant factors affecting survival (p<0.05). In the adjusted

230 model, hypoxia (adjusted hazard ratio (aHR) = 1.9 [95% confidence interval (CI):1.2–2.8]), older age  
 231 (60 + years) (aHR) = 1.8 [95% CI:1.3–2.6]), and dyspnea (aHR 1.5 [95% CI: 1.2–2.0]) were associated  
 232 with a higher risk of death (Table 2).

233 **Table 2:** Predictors of mortality in hospitalized COVID-19 patients with hypoxia, Kenya 2020-21

| <b>Factors</b>                | <b>% complete*</b> | <b>Dead, n/N (%)</b>    | <b>cHR<sup>†</sup> [95%CI]</b> | <b>aHR<sup>‡</sup> [95%CI]</b> |
|-------------------------------|--------------------|-------------------------|--------------------------------|--------------------------------|
| <b>Total</b>                  |                    | <b>365 /1122 (32.5)</b> |                                |                                |
| <b>Oxygen Saturation</b>      | 89.9               |                         |                                |                                |
| Hypoxia                       |                    | 330/868 (38.0)          | 2.3[1.5-3.4]                   | 1.9[1.2-2.8] <sup>¶</sup>      |
| Normal SpO <sub>2</sub>       |                    | 27/198 (13.6)           | ref.                           | ref.                           |
| <b>Sex</b>                    | 89.9               |                         |                                | n.i                            |
| Male                          |                    | 200/595 (33.6)          | 1.0[0.8-1.3]                   |                                |
| Female                        |                    | 165/523 (31.5)          | ref.                           |                                |
| <b>Age (years)</b>            | 94.6               |                         |                                | n.i                            |
| <40                           |                    | 48/273 (17.6)           | ref.                           | ref.                           |
| 40 - 59                       |                    | 119/403 (29.5)          | 1.5[1.1-2.2]                   | 1.1[0.8-1.7]                   |
| 60+                           |                    | 196/443 (44.2)          | 2.4[1.7-3.4]                   | 1.8[1.3-2.6] <sup>¶</sup>      |
| <b>Occupation</b>             | 58.9               |                         |                                | n.i                            |
| Formal                        |                    | 86/297 (29.0)           | ref.                           |                                |
| Informal                      |                    | 136/390 (34.9)          | 1.3[1.0-1.8]                   |                                |
| Other                         |                    | 6/14 (42.9)             | 1.7[0.7-4.3]                   |                                |
| <b>HIV status</b>             | 9.0                |                         |                                | n.i                            |
| Positive                      |                    | 33/94 (35.1)            | 3.0[0.4-22]                    |                                |
| Negative                      |                    | 2/11 (18.2)             | ref.                           |                                |
| <b>Pulse</b>                  | 82.9               |                         |                                | n.i                            |
| Low PR (<60bpm)               |                    | 17/35(48.6)             | 1.8[1.0-3.1]                   |                                |
| Normal PR (60-100bpm)         |                    | 169/601(28.1)           | ref.                           |                                |
| High PR (>100 bpm)            |                    | 146/347(42.1)           | 1.3[1.0-1.7]                   |                                |
| <b>Hypertension</b>           | 94.7               |                         |                                |                                |
| No                            |                    | 211/713 (29.6)          | ref.                           | ref.                           |
| Yes                           |                    | 154/409 (37.7)          | 1.2[1.0-1.5]                   | 1.0[0.8-1.2]                   |
| <b>Diabetes</b>               | 94.7               |                         |                                |                                |
| No                            |                    | 264/864 (30.6)          | ref.                           | ref.                           |
| Yes                           |                    | 101/258 (39.1)          | 1.2[0.9-1.5]                   | 1.1[0.8-1.4]                   |
| <b>Cough and chest issues</b> | 94.7               |                         |                                | n.i                            |
| Cough and chest tightness     |                    | 134/412 (32.5)          | ref.                           |                                |
| Only cough                    |                    | 141/418 (33.7)          | 1.1[0.9-1.5]                   |                                |
| Only chest tightness          |                    | 18/83 (21.7)            | 0.7[0.4-1.2]                   |                                |
| No cough or chest tightness   |                    | 72/209 (34.4)           | 1.3[0.9-1.8]                   |                                |
| <b>Chest X-ray results</b>    | 28.6               |                         |                                | n.i                            |
| Normal                        |                    | 10/35 (28.6)            | ref.                           |                                |
| Abnormal                      |                    | 99/298 (33.2)           | 1.3[0.6-2.5]                   |                                |
| <b>Cardiovascular disease</b> | 94.7               |                         |                                |                                |
| No issues reported            |                    | 352/1100 (32.0)         | ref.                           | ref.                           |
| Cardiovascular issues         |                    | 13/22 (59.1)            | 1.7[0.9-3.0]                   | 1.3[0.7-2.4]                   |
| <b>Dyspnea</b>                | 94.7               |                         |                                |                                |
| None                          |                    | 118/515 (22.9)          | ref.                           | ref.                           |
| Dyspnea                       |                    | 247/607 (40.7)          | 1.7[1.3-2.2]                   | 1.5[1.2-2.0] <sup>¶</sup>      |

234

235 \*Percentage of records with complete time-to-event data

236 †Crude hazard ratios

237 ‡Adjusted hazard ratio (adjusted for hypoxia, age, hypertension, diabetes, cardiovascular issues, and  
238 dyspnea)

239 †Statistically significant at  $p < 0.05$

240 ref. = referent category

241 n.i = not included

242

## 243 **Discussion**

244 This study highlights the critical role of hypoxia in determining the outcomes of patients hospitalized  
245 with COVID-19. Notably, 8 out of 10 patients hospitalized with COVID-19 had hypoxia at admission, a  
246 condition that was associated with significantly higher mortality rates compared to those with normal  
247 oxygen saturation levels. The prevalence of hypoxia was particularly higher among older patients and  
248 those with clinical symptoms consistent with COVID-19, such as cough, chest tightness, low pulse rate,  
249 dyspnea, and underlying comorbidities like hypertension and HIV infection. This relationship suggests  
250 that symptomatic COVID-19 disease may have a consistent prognosis even in the absence of diagnostic  
251 testing, a finding supported by similar studies [5]. Interestingly, about 40% of our patients experienced s  
252ilent hypoxia, a proportion that aligns with estimates from other studies, which range between 4.8% and  
253 65% [5]. This emphasizes the importance of pulse oximetry at triage or admission, even for patients  
254 without apparent respiratory symptoms, to enable timely supplementation and other interventions that  
255 can improve outcomes.

256

257 Mortality in our study was over twice as high among patients with hypoxia compared to those with  
258 normal SpO<sub>2</sub> saturation (38.0% vs. 13.6%). This underscores the severe consequences of oxygen  
259 deprivation in COVID-19, corroborating existing literature that identifies hypoxia as a key predictor of  
260 poor prognosis in respiratory infections [18,19,28]. Moreover, older hypoxic patients had twice the risk  
261 of death compared with patients under 40, which is consistent with global findings [29]. While

262 hypertension was not independently associated with mortality in our study, it is generally recognized as  
263 a risk factor for severe COVID-19 and poor outcomes [30]. SpO<sub>2</sub> has emerged as a crucial predictor of  
264 survival in COVID-19 patients [20]. Our findings suggest that normal SpO<sub>2</sub> levels are associated with  
265 better survival probabilities, while hypoxia, along with age and dyspnea, independently predicts a higher  
266 risk of death. Therefore, oxygen supplementation is essential for hypoxic patients, as studies have shown  
267 that higher SpO<sub>2</sub> levels after supplementation are linked to reduced mortality [5], and improved survival  
268 probabilities [19]. The observation that patients with hypoxia had over three times the mortality rate  
269 underscores the importance of assessing oxygen saturation in all COVID-19 patients, regardless of their  
270 symptomatic presentation.

271  
272 Oxygen supplementation is recommended for hypoxic patients. However, only for only 3 out of 5  
273 (68.6%) of hypoxic patients in our study received oxygen supplementation, indicating insufficient  
274 management in our setting. The national guidelines recommend oxygen supplementation for patients  
275 with SpO<sub>2</sub> ≤94%, but a more strict target of 92–96% might have been beneficial [31], given that the  
276 Kenyan cutoff was less stringent. We also lacked data on whether follow-up SpO<sub>2</sub> readings were taken  
277 after initial drops by 3-5%, which is a recommended practice, as has been suggested by Galwankar et al.  
278 [32]. Community-level SpO<sub>2</sub> monitoring, such as providing oximeters to households [34], could be  
279 beneficial for ongoing patient management post-discharge, though we did not follow patients after  
280 discharge.

281  
282 Our study had some limitations. First, we lacked COVID-19 diagnostic information for some cases,  
283 relying instead on clinician documentation based on symptomatic presentation. Additionally, SpO<sub>2</sub> data  
284 were missing for 5.2% of records, but this low proportion is unlikely to bias our findings. The relatively  
285 stringent definition of hypoxemia used in this study may have led to the misclassification of some

286 patients as having silent hypoxemia, though we adhered to national guidelines. The study's findings may  
287 not be generalized to the broader Kenyan population, as the sites were purposefully selected. We also  
288 did not track patient outcomes of COVID-19 patients post-discharge. Finally, we could not determine  
289 whether hypertensive patients had a history of hypertension or elevated blood pressure before admission.  
290 Despite these limitations, our study provides valuable insights into the utility of SpO<sub>2</sub> monitoring for the  
291 clinical management of hospitalized COVID-19 patients.

292

293 Our study suggests that while comorbid conditions like hypertension, diabetes, and cardiovascular  
294 disease are important, they did not significantly alter mortality risk after adjusting for hypoxia, age, and  
295 dyspnea. This indicates that hypoxia and age are the predominant drivers of mortality in hospitalized  
296 COVID-19 patients, with other comorbidities playing a secondary role. The frequent occurrence of  
297 hypoxia among hospitalized COVID-19 patients, often without accompanying dyspnea, underscores the  
298 importance of using SpO<sub>2</sub> measurements to guide hospitalization decisions and improve outcomes,  
299 particularly for older or more critically ill patients. Finally, the higher mortality among patients with  
300 silent hypoxia highlights the need for regular SpO<sub>2</sub> monitoring to enhance patient outcomes, especially  
301 for those with comorbidities.

302

### 303 **Acknowledgements**

304 We thank the Kenyan Ministry of Health, the Division of Disease Surveillance and Response (DDSR),  
305 the National AIDs and STIs Control Programme, VL laboratories, implementing partners, and patients.  
306 This work was supported by the President's Emergency Plan for AIDS Relief (PEPFAR) through the  
307 Centers for Disease Control and Prevention (CDC).

308 **Authors contributions**

309 AW analyzed the data and drafted the initial and subsequent drafts of the manuscript, JMW contributed  
310 to the analyses. AN, DO, MM, and WW contributed substantially to protocol development, data  
311 collection, and critical review of the manuscript. All authors read and approved the final version of the  
312 manuscript.

313 **Disclaimer**

314 The findings and conclusions in this manuscript are those of the authors and do not necessarily represent  
315 the official position of the funding agencies.

316



## 317 **References**

- 318 1 Gattinoni L, Chiumello D, Caironi P, Busana M, Romitti F, Brazzi L, Camporota L. COVID-19  
319 pneumonia: different respiratory treatments for different phenotypes? *Intensive Care Med*  
320 2020;46:1099–102. doi:10.1007/s00134-020-06033-2.
- 321 2 Nitsure M, Sarangi B, Shankar GH, Reddy VS, Walimbe A, Sharma V, Prayag S. Mechanisms of  
322 hypoxia in covid-19 patients: A pathophysiologic reflection. *Indian J Crit Care Med* 2020;24:967–  
323 70. doi:10.5005/jp-journals-10071-23547.
- 324 3 Robert Cronin Yung Peng, Rose Khavari ND. Pulmonary Vascular Endothelialitis, Thrombosis,  
325 and Angiogenesis in Covid-19. *Physiol Behav* 2017;176:139–48. doi:10.1159/000444169.Carotid.
- 326 4 Bepouka B, Odio O, Mayasi N, Longokolo M, Mangala D, Mandina M, Mbula M, Kayembe JM,  
327 Situakibanza H. Prevalence and Outcomes of COVID –19 Patients with Happy Hypoxia: A  
328 Systematic Review. *Infect Drug Resist* 2022;15:5619–28. doi:10.2147/IDR.S378060.
- 329 5 Xie J, Covassin N, Fan Z, Singh P, Gao W, Li G, Kara T, K. SV. Association Between Hypoxemia  
330 and Mortality in Patients With COVID-19. *Mayo Clin Proc* 2020;7:33–48.
- 331 6 Chandra A, Chakraborty U, Pal J, Karmakar P. Silent hypoxia: a frequently overlooked clinical  
332 entity in patients with COVID-19. *BMJ Case Rep* 2020;13. doi:10.1136/bcr-2020-237207.
- 333 7 Choi KJ, Hong HL, Kim EJ. The association between mortality and the oxygen saturation and  
334 fraction of inhaled oxygen in patients requiring oxygen therapy due to COVID-19–Associated  
335 pneumonia. *Tuberc Respir Dis (Seoul)* 2021;84:125–33. doi:10.4046/trd.2020.0126.
- 336 8 De Souza C, C M Miranda E, Hadich D, Nunes M, Masetto D, C P Morato D, Scandiuzzi R, Ferreira  
337 M do C, Zambom L, von Zuben A. Peripheral oxygen measurements in suspected elderly COVID-  
338 19 patients can be an effective tool for alerting physicians. *MOJ Public Heal* 2021;10:40–2.

- 339           doi:10.15406/mojph.2021.10.00357.
- 340    9    Bhutta Beenish S., Alghoula Faysal, Berim Ilya. Hypoxia. Treasure Island (FL): StatPearls  
341    Publishing; 2022.
- 342    10    Ministry of Health Kenya. Guideline on the Management of Covid-19 in Kenya 2021:7–7.
- 343    11    World Health Organization. Interim Guidance for Member States-On the Use of Pulse Oximetry in  
344    Monitoring Covid-19 Patients Under Home-Based Isolation and Care. 2021.
- 345    12    World Health Organization. Guideline Clinical management of COVID-19 patients: living  
346    guideline, 23 November 2021. 2021.
- 347    13    Starr N, Rebollo D, Asemu YM, Akalu L, Mohammed HA, Menchamo MW, Melese E, Bitew S,  
348    Wilson I, Tadesse M, Weiser TG. Pulse oximetry in low-resource settings during the COVID-19  
349    pandemic. *Lancet Glob Heal* 2020;8:e1121–2. doi:10.1016/S2214-109X(20)30287-4.
- 350    14    Ayebare RR, Flick R, Okware S, Bodo B, Lamorde M. Adoption of COVID-19 triage strategies for  
351    low-income settings. *Lancet Respir Med* 2020;8:e22. doi:10.1016/S2213-2600(20)30114-4.
- 352    15    Ratnayake A, Kumarihamy P, Gunaratne S, Abeysinghe H, Perera S, Ekanayake S. Different  
353    Outcomes of “silent Hypoxia” in Patients with COVID-19 Pneumonia: A Case Series and Literature  
354    Review. *Case Reports Crit Care* 2021;2021. doi:10.1155/2021/1215274.
- 355    16    Siswanto, Gani M, Fauzi AR, Yuliyanti RE, Inggriani MP, Nugroho B, Agustiningsih D, Gunadi.  
356    Possible silent hypoxemia in a COVID-19 patient: A case report. *Ann Med Surg* 2020;60:583–6.  
357    doi:10.1016/j.amsu.2020.11.053.
- 358    17    Kim HW, Capaccione KM, Li G, Luk L, Widemon RS, Rahman O, Beylergil V, Mitchell R,  
359    D’souza BM, Leb JS, Dumeer S, Bentley-Hibbert S, Liu M, Jambawalikar S, Austin JHM, et al.  
360    The role of initial chest X-ray in triaging patients with suspected COVID-19 during the pandemic

- 361 n.d. doi:10.1007/s10140-020-01808-y/Published.
- 362 18 Elijah IM, Amsalu E, Jian X, Cao M, Mibei EK, Kerosi DO, Mwatsahu FG, Wang W, Onyangore  
363 F, Wang Y. Characterization and determinant factors of critical illness and in-hospital mortality of  
364 COVID-19 patients: A retrospective cohort of 1,792 patients in Kenya. *Biosaf Heal* 2020.
- 365 19 Mejía F, Medina C, Cornejo E, Morello E, Vásquez S, Alave J, Schwalb A, Málaga G. Oxygen  
366 saturation as a predictor of mortality in hospitalized adult patients with COVID-19 in a public  
367 hospital in Lima, Peru. *PLoS One* 2020;15:1–12. doi:10.1371/journal.pone.0244171.
- 368 20 Alhusain F, Alromaih A, Alhajress G, Alsaghyir A, Alqobaisi A, Alaboodi T, Alsalamah M.  
369 Predictors and clinical outcomes of silent hypoxia in COVID-19 patients, a single-center  
370 retrospective cohort study. *J Infect Public Health* 2021;14:1595–9. doi:10.1016/j.jiph.2021.09.007.
- 371 21 Farishta M, Sankari. A. *Pulmonary Hypertension Due to Lung Disease or Hypoxia*. Treasure Island  
372 (FL): StatPearls Publishing; 2023.
- 373 22 Vulturar DM, Crivii CB, Orăsan OH, Palade E, Buzoianu AD, Zehan IG, Todea DA. Obesity  
374 Impact on SARS-CoV-2 Infection: Pros and Cons “Obesity Paradox”—A Systematic Review. *J*  
375 *Clin Med* 2022;11. doi:10.3390/jcm11133844.
- 376 23 Pettit NN, MacKenzie EL, Ridgway JP, Pursell K, Ash D, Patel B, Pho MT. Obesity is Associated  
377 with Increased Risk for Mortality Among Hospitalized Patients with COVID-19. *Obesity*  
378 2020;28:1806–10. doi:10.1002/oby.22941.
- 379 24 Nasimiyu C, Matoke-Muhia D, Rono GK, Osoro E, Ouso DO, Mwangi JM, Mwikwabe N,  
380 Thiong’o K, Dawa J, Ngere I, Gachohi J, Kariuki S, Amukoye E, Mureithi M, Ngere P, et al.  
381 Imported SARS-CoV-2 Variants of Concern Drove Spread of Infections across Kenya during the  
382 Second Year of the Pandemic. *MedRxiv* 2022;2:586–98. doi:10.3390/covid2050044.

- 383 25 World Health Organization. WHO Health Emergency Dashboard. WHO Homepage 2023.  
384 <https://covid19.who.int/region/afro/country/ke>.
- 385 26 National AIDS and STI Control Program (NASCOP). Kenya population-based HIV impact  
386 assessment 2018-2019 Preliminary Report. Nascop 2020:1–40.
- 387 27 Ministry of Health Kenya. Covid-19 Outbreak in Kenya: Daily Situation Report - 654 2021;148:1–  
388 16.
- 389 28 Sobral MFF, Roazzi A, da Penha Sobral AIG, de Oliveira BRB, Duarte GB, da Silva JF, Nogueira  
390 RMTBL. A retrospective cohort study of 238,000 COVID-19 hospitalizations and deaths in Brazil.  
391 *Sci Rep* 2022;12:1–11. doi:10.1038/s41598-022-07538-0.
- 392 29 Yang J, Zheng Y, Gou X, Pu K, Chen Z. Prevalence of comorbidities and its effects in patients  
393 infected with SARS-CoV-2: a systematic review and meta-analysis. *Int J Infect Dis* 2020;94:91–5.
- 394 30 Mahamat-Saleh Y, Fiolet T, Rebeaud ME, Mulot M, Guihur A, El Fatouhi D, Laouali N, Peiffer-  
395 Smadja N, Aune D, Severi G. Diabetes, hypertension, body mass index, smoking and COVID-19-  
396 related mortality: A systematic review and meta-analysis of observational studies. *BMJ Open*  
397 2021;11. doi:10.1136/bmjopen-2021-052777.
- 398 31 Cajanding R. Oxygen use and saturation targets in patients with COVID-19: Are we giving too  
399 much or aiming too low? *Nurs Crit Care* 2022;27:282–5. doi:10.1111/nicc.12709.
- 400 32 Galwankar S, Paladino L, Gaieski D, Nanayakkara K, Somma S, Grover J, Stawicki S. Management  
401 algorithm for subclinical hypoxemia in coronavirus disease-2019 patients: Intercepting the “Silent  
402 Killer.” *J Emergencies, Trauma Shock* 2020;13:110–3. doi:10.4103/JETS.JETS\_72\_20.
- 403 33 Josephine N, Fuglebjerg U, Jensen TO, Hoyer N, Rysø CK, Lindegaard B, Harboe ZB. Since  
404 January 2020 Elsevier has created a COVID-19 resource centre with free information in English

405 and Mandarin on the novel coronavirus COVID- 19 . The COVID-19 resource centre is hosted on  
406 Elsevier Connect , the company ' s public news and information 2020.

407 34 Ngiam JN, Chew NWS, Sia CH, Kong WKF, Poh KK. Silent hypoxia: pulse oximetry and its  
408 relation to COVID-19 in Singapore. Singapore Med J 2023;64:222–5.  
409 doi:10.11622/smedj.2021134.

410

## 411 **Figures**

### 412 **Figure 1: Hypoxia and outcomes for COVID-19 patients with and without dyspnea, Kenya 2020-21**

413 Describes the outcomes for COVID-19 patients by dyspnea.

414

### 415 **Figure 2: Hypoxia and mortality for all patients with and without hypertension, Kenya 2020-21**

416 Describes mortality proportions for all patients with and without hypertension.

417

### 418 **Figure 3: Survival probabilities for COVID-19 patients on room air (a) and on oxygen 419 supplementation (b), by oxygen saturation levels, Kenya 2020-21**

420 Shows Kaplan meier survival probabilities for patients who were not on oxygen supplementation (room  
421 air) and those who were on oxygen supplementation.

422

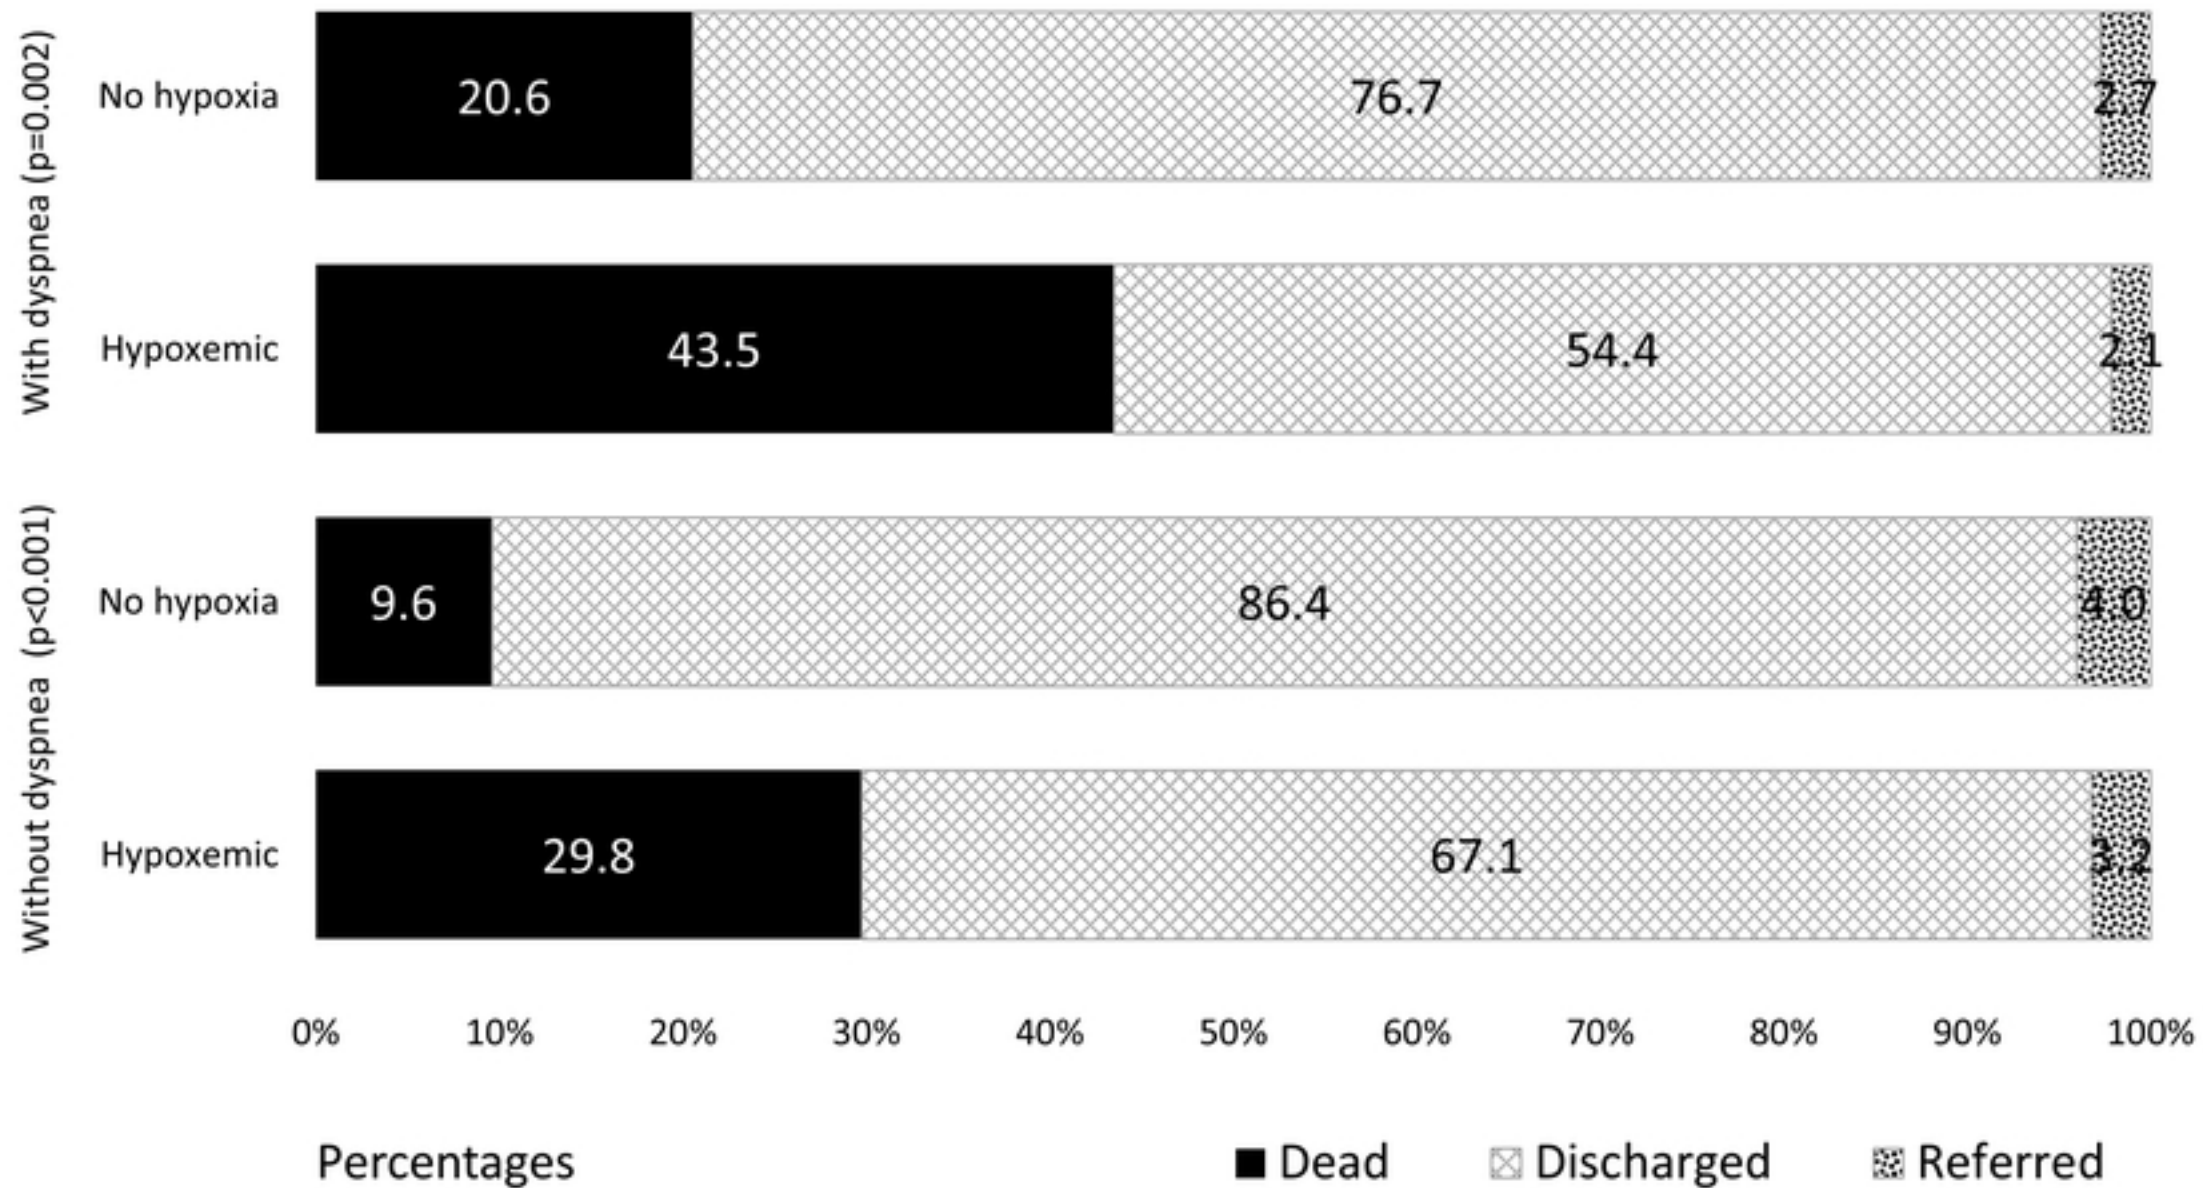

Figure 1

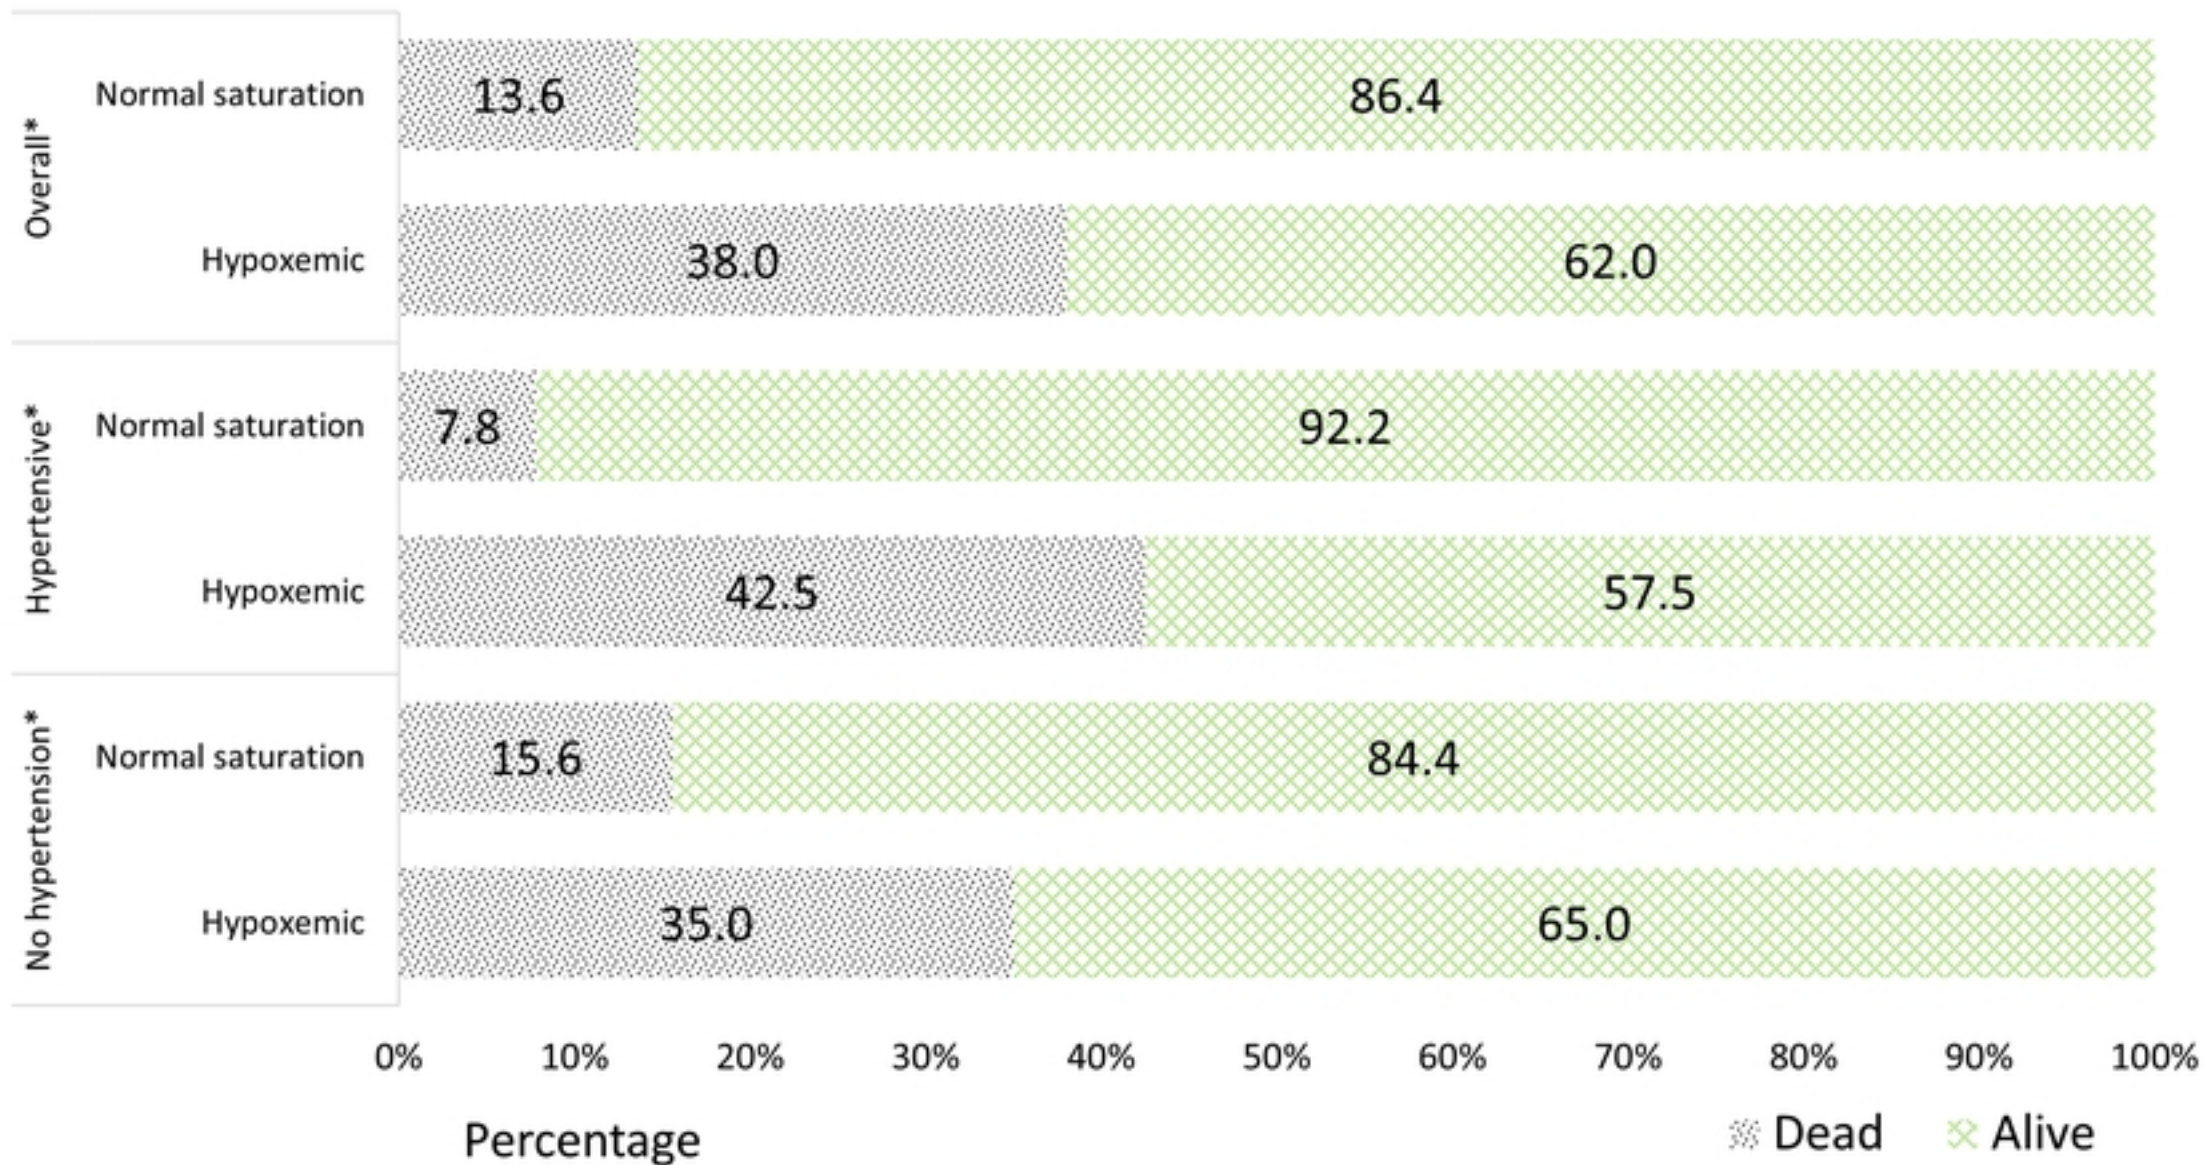

\*p<0.001

Figure 2

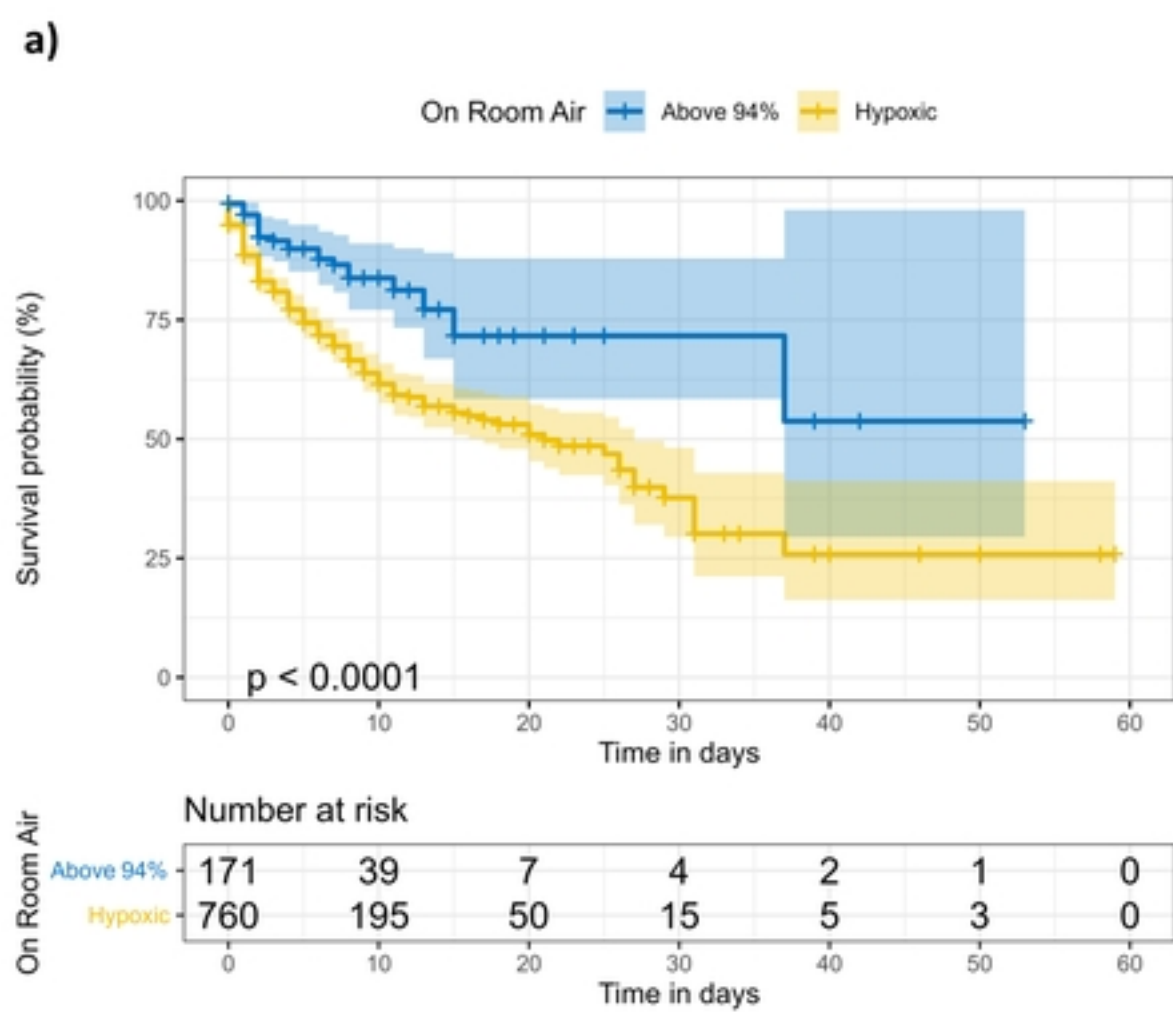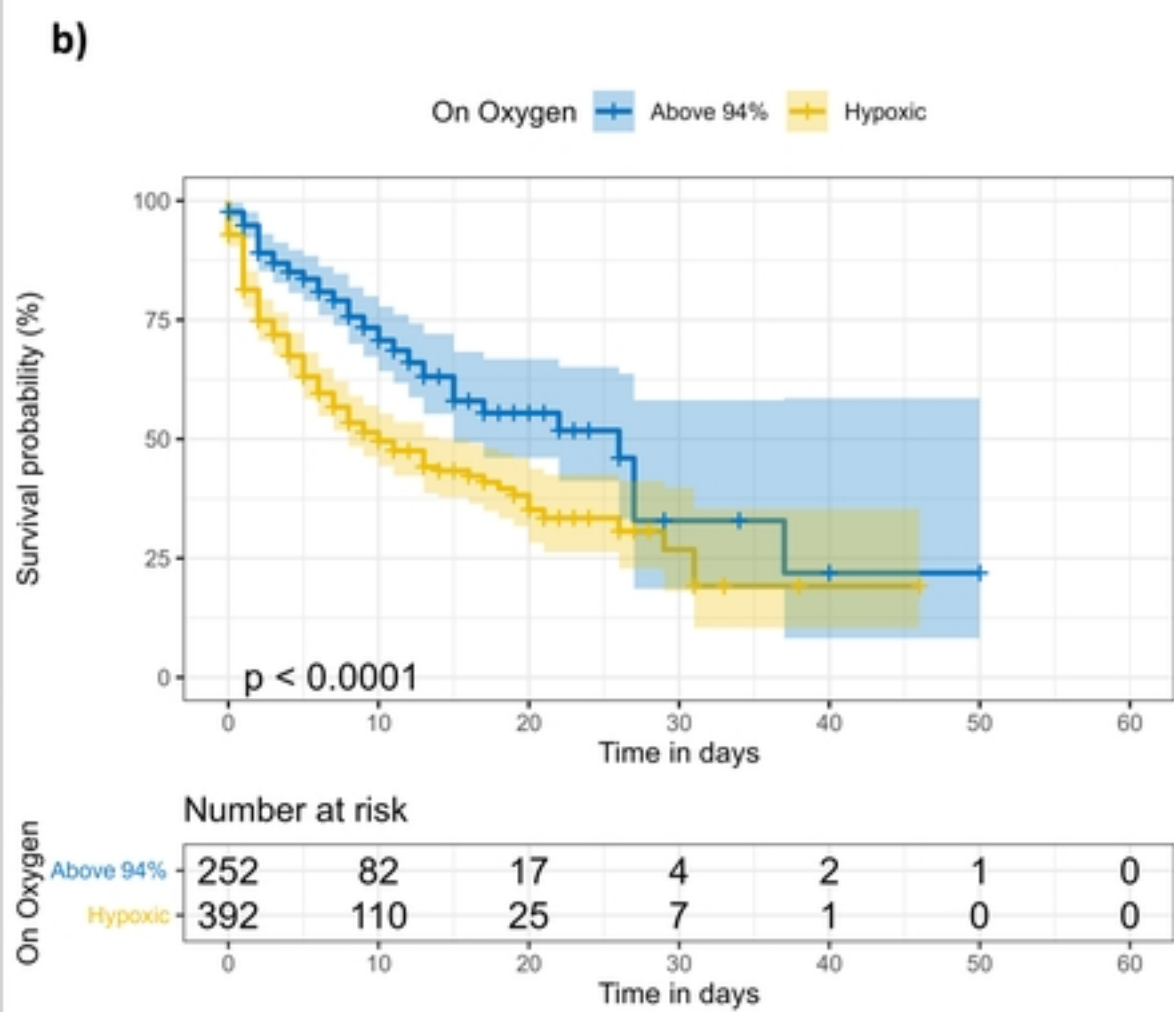

Figure 3
